# Supplementary material for: Development of sex- and genotype-specific behavioral phenotypes in a Shank3 mouse model for neurodevelopmental disorders
Source: PubMed Central journal article supplement (PMC9868822; doi:10.3389/fnbeh.2022.1051175), 2023-01-09
Supplement: Data_Sheet_1.pdf [file Data_Sheet_1.pdf]

## *Supplementary Material*

### **1 Supplementary Methods**

#### **1.1 Righting reflex**

To study the righting reflex of the pups, births were controlled each morning and evening. Pups of both sexes were individually identified with long-lasting sub-cutaneous tattoos (green tattoo paste, Ketchum Manufacturing Inc.) on the paws on postnatal day 1 (PND1). On PND 2, 4, 6, 8, and 10, the righting reflex and the body weight of the pups were determined. The pups were placed on a flat surface on their back and the time till they turned into a normal position was determined. The maximum latency time to right themselves up was set to 120 s.

#### **1.2 Ultrasonic vocalization (USV) recording during direct social dyadic test**

During the direct social dyadic test, the USV of the mice were recorded with a Condenser ultrasound microphone Polaroid/COMPA, the interface UltraSoundGate 116H/85, and an Avisoft SASLab Pro Recorder (Avisoft Bioacustics; sampling frequency 300 kHz; FFT-length: 1024 points; 16-bit format). USV was analyzed with the open source MATLAB-based Vocal Mat software developed and described by Fonseca and colleagues (Fonseca et al., 2021) to determine the call rate.

#### **1.3 Three-chamber sociability test**

To measure sociability in the animals, the three-chamber sociability test was applied. The mouse was placed in the center of a three-chambered plexiglass apparatus and allowed to explore all three chambers with one empty cage to both the left and right for 10 min. In a second phase of the test, two similar objects were placed in the cages, and the mouse was allowed to freely explore the three-chamber apparatus for another 10 min. In the third phase, the sociability test was performed. Therefore, one stranger C56/BL6 mouse of the same sex and age was placed in one cage and a novel object was placed in the other cage. Again, the mouse was allowed to explore the set-up for 10 min. All test phases were video-recorded and tracked with EthoVision 16 software (Noldus Technology). Animals that spent most of the test time climbing on the cages to escape the three-chamber apparatus were considered not to be attending the test and were excluded from the data.

### **2 Supplementary References**

Fonseca, A.H.O., Santana, G.M., Bosque Ortiz, G.M., Bampi, S., Dietrich, M.O., 2021. Analysis of ultrasonic vocalizations from mice using computer vision and machine learning. *eLife* 10, 1–22.  
<https://doi.org/10.7554/eLife.59161>

## 3 Supplementary Figures

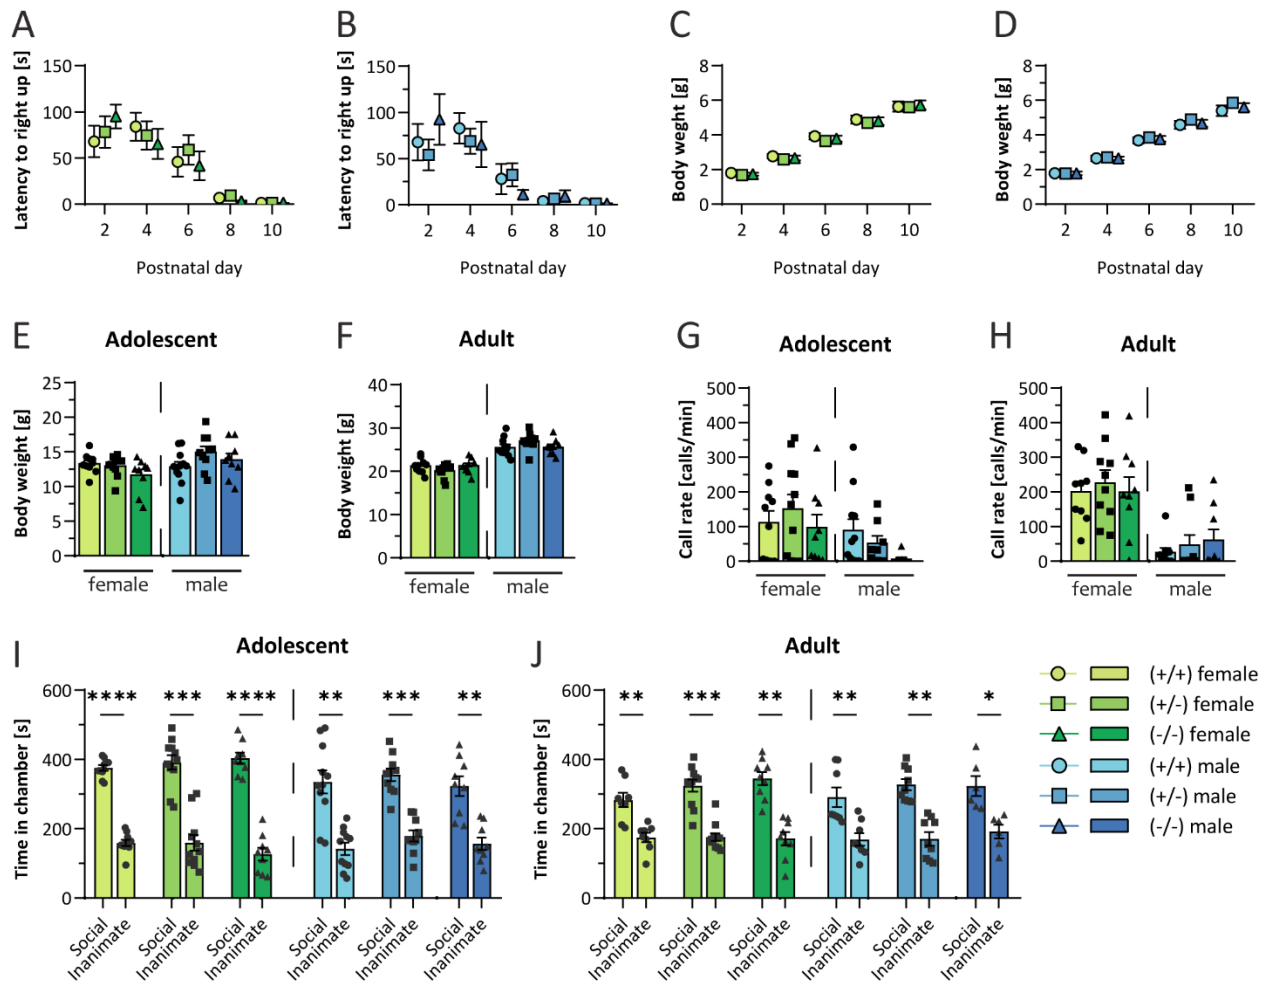

**Supplementary Figure 1:** (A–B) The righting reflex of pups and (C–D) the body weight were determined at postnatal day (PND) 2, PND4, PND6, PND8, and PND10 in female and male mice, respectively. Comparison of the body weight at postnatal week 4 (E) and postnatal week 13 (F) in male and female WT, *Shank3*(+/-), and *Shank3*(-/-) mice. (G–H) Call rate emitted during a 3 min USV recording on the direct social interaction with a same sex- and age-matched C57BL/6 stranger mouse. (I–J) Time spent either in the chamber with a social stimulus (same-sex and -age, stranger mouse) or in the chamber with an inanimate object in the three-chamber sociability test. All data are represented as means with SEM with 6–11 animals per group. Significance levels (p-values) were set to 0.05 ( $p \leq 0.05^*$ ,  $p \leq 0.01^{**}$ ,  $p \leq 0.001^{***}$ ,  $p \leq 0.0001^{****}$ ) with 95% confidence interval. See Supplementary Table 6 for detailed statistical information.

## 4 Supplementary Tables

**Supplementary Table 1: Cohorts, age of animals, and timely sequence of behavior testing**

|                 | Female |       |       | Male  |       |       | Age at testing      |
|-----------------|--------|-------|-------|-------|-------|-------|---------------------|
|                 | (+/+)  | (+/-) | (-/-) | (+/+) | (+/-) | (-/-) |                     |
| Righting reflex | 10     | 11    | 9     | 8     | 10    | 6     | P2, P4, P6, P8, P10 |
| Body weight     | 10     | 11    | 9     | 8     | 10    | 6     | P2, P4, P6, P8, P10 |

  

|                                                 | Female |        |        |        |        |        | Male   |        |        |        |        |        | Age at testing |           |
|-------------------------------------------------|--------|--------|--------|--------|--------|--------|--------|--------|--------|--------|--------|--------|----------------|-----------|
|                                                 | (+/+)  |        | (+/-)  |        | (-/-)  |        | (+/+)  |        | (+/-)  |        | (-/-)  |        | 1. set         | 2. set    |
|                                                 | 1. set | 2. set | 1. set | 2. set | 1. set | 2. set | 1. set | 2. set | 1. set | 2. set | 1. set | 2. set | 1. set         | 2. set    |
| Body weight                                     | 10     | 10     | 11     | 11     | 9      | 9      | 11     | 11     | 10     | 10     | 9      | 9      | P26-P29        | P89-P95   |
| Grid hanging test                               | 10     | 10     | 11     | 11     | 9      | 9      | 11     | 11     | 10     | 10     | 9      | 9      | P26-P29        | P89-P95   |
| Grip strength test                              | 10     | 10     | 11     | 11     | 9      | 9      | 11     | 11     | 10     | 10     | 9      | 9      | P27-P30        | P90-P93   |
| Marbles burying test                            | 10     | 10     | 11     | 11     | 9      | 9      | 11     | 11     | 10     | 10     | 9      | 9      | P28-P31        | P90-P94   |
| Open field test                                 | 10     | 10     | 11     | 11     | 9      | 9      | 11     | 11     | 10     | 10     | 9      | 9      | P29-P32        | P91-P95   |
| 3 chamber sociability test                      | 10     | 8*     | 11     | 11     | 9      | 9      | 11     | 11     | 10     | 9*     | 9      | 9      | P33-P36        | P92-P99   |
| Nestlet shredding test                          | 10     | 10     | 11     | 11     | 9      | 9      | 11     | 11     | 10     | 10     | 9      | 9      | P35-P38        | P92-P103  |
| Self-directed behavior (self-grooming, digging) | 10     | 10     | 11     | 11     | 9      | 9      | 11     | 11     | 10     | 10     | 9      | 9      | P36-P41        | P96-P104  |
| Direct social dyadic test                       | 10     | 10     | 11     | 10*    | 9      | 9      | 11     | 11     | 9*     | 10     | 9      | 9      | P36-P41        | P96-P104  |
| Rotarod                                         | 10     | 10     | 11     | 11     | 9      | 9      | 11     | 11     | 10     | 10     | 9      | 9      | P40-P47        | P99-P110  |
| Barnes Maze and reversal Barnes Maze test       | 10     | 10     | 11     | 11     | 9      | 9      | 11     | 11     | 10     | 10     | 9      | 9      | P47-P62        | P104-P123 |

\*Missing animals due to technical issues with video recording software.

**Supplementary Table 2: Statistical information on Figure 1**

| Muscle function                  | Test       | Normal distributed? | Genotype |         | Sex    |         | Genotype × sex |         | Multiple comparison |                   |              | Pooled sexes |              |              |        |         |        |
|----------------------------------|------------|---------------------|----------|---------|--------|---------|----------------|---------|---------------------|-------------------|--------------|--------------|--------------|--------------|--------|---------|--------|
|                                  |            |                     | F        | p-value | F      | p-value | F              | p-value | Female (+/+ vs +/-) | Male (+/+ vs +/-) | (+/+ vs +/-) | (+/+ vs +/-) | (+/+ vs +/-) | (+/+ vs +/-) |        |         |        |
|                                  |            |                     |          |         |        |         |                |         | (+/+ vs +/-)        | (+/+ vs +/-)      | (+/+ vs +/-) | (+/+ vs +/-) | (+/+ vs +/-) | (+/+ vs +/-) |        |         |        |
| Grip strength, adolescent        | 2way ANOVA | yes                 | 0.9074   | 0.4096  | 0.2666 | 0.6077  | 1.874          | 0.1633  | 0.9946              | 0.9163            | 0.9482       | 0.7811       | 0.0648       | 0.2508       | 0.9139 | 0.3897  | 0.6224 |
| Grip strength, adult             | 2way ANOVA | yes                 | 0.7954   | 0.4566  | 30.96  | <0.0001 | 0.2257         | 0.7987  | 0.5793              | 0.9807            | 0.7162       | 0.7265       | 0.6472       | 0.9882       | 0.4305 | 0.7297  | 0.8984 |
| Grid hanging time, adolescent    | 2way ANOVA | no                  | 18.84    | <0.0001 | 2.147  | 0.1487  | 1.922          | 0.1563  | 0.2767              | 0.0063            | 0.1876       | 0.6626       | <0.0001      | 0.0002       | 0.2134 | <0.0001 | 0.0002 |
| Grid hanging time, adult         | 2way ANOVA | no                  | 13.07    | <0.0001 | 17.39  | 0.0001  | 0.9720         | 0.3848  | 0.7367              | 0.0270            | 0.1225       | 0.9960       | 0.0005       | 0.0008       | 0.8267 | <0.0001 | 0.0003 |
| Distance moved in OF, adolescent | 2way ANOVA | yes                 | 8.149    | 0.0008  | 3.056  | 0.0861  | 1.597          | 0.2118  | 0.3528              | 0.0006            | 0.0230       | 0.5653       | 0.2211       | 0.7804       | 0.2118 | 0.0005  | 0.0527 |
| Distance moved in OF, adult      | 2way ANOVA | yes                 | 11.87    | <0.0001 | 1.135  | 0.2914  | 1.893          | 0.1604  | 0.6006              | 0.0139            | 0.0004       | 0.4443       | 0.0068       | 0.2011       | 0.9848 | 0.0002  | 0.0003 |

  

| Rotarod            | Test       | Normal distributed? | Trial |         | Genotype |         | Trial × genotype |         | Multiple comparison |              |              |
|--------------------|------------|---------------------|-------|---------|----------|---------|------------------|---------|---------------------|--------------|--------------|
|                    |            |                     | F     | p-value | F        | p-value | F                | p-value | (+/+ vs +/-)        | (+/+ vs +/-) | (+/+ vs +/-) |
| Female, adolescent | 2way ANOVA | yes                 | 4.928 | <0.0001 | 0.2691   | 0.7661  | 0.9421           | 0.5529  | -                   | -            | -            |
| Trial 1            |            |                     |       |         |          |         |                  |         | 0.9406              | 0.9739       | 0.8077       |



| Rotarod     | Test       | Normal distributed? | Trial |         | Genotype |         | Trial × genotype |         | Multiple comparison |                |                |
|-------------|------------|---------------------|-------|---------|----------|---------|------------------|---------|---------------------|----------------|----------------|
|             |            |                     | F     | p-value | F        | p-value | F                | p-value | (+/+) vs (+/-)      | (+/+) vs (-/-) | (+/-) vs (-/-) |
|             |            |                     |       |         |          |         |                  |         | 0.5648              | 0.9685         | 0.4539         |
|             |            |                     |       |         |          |         |                  |         | 0.8189              | 0.6685         | 0.2115         |
|             |            |                     |       |         |          |         |                  |         | 0.8678              | 0.8501         | 0.5456         |
|             |            |                     |       |         |          |         |                  |         | 0.6386              | 0.9329         | 0.8283         |
|             |            |                     |       |         |          |         |                  |         | 0.7307              | 0.6203         | 0.2698         |
|             |            |                     |       |         |          |         |                  |         | 0.4161              | 0.8022         | 0.3646         |
|             |            |                     |       |         |          |         |                  |         | 0.3464              | >0.9999        | 0.3557         |
|             |            |                     |       |         |          |         |                  |         | 0.1838              | 0.3319         | 0.7967         |
|             |            |                     |       |         |          |         |                  |         | 0.9917              | 0.6131         | 0.7745         |
|             |            |                     |       |         |          |         |                  |         | 0.3368              | 0.7937         | 0.7315         |
|             |            |                     |       |         |          |         |                  |         | 0.5502              | 0.5941         | 0.9877         |
|             |            |                     |       |         |          |         |                  |         | 0.7313              | 0.7191         | 0.3793         |
|             |            |                     |       |         |          |         |                  |         | 0.7339              | 0.9066         | 0.9585         |
|             |            |                     |       |         |          |         |                  |         | 0.4703              | 0.8450         | 0.8485         |
| Male, adult | 2way ANOVA | yes                 | 5.448 | <0.0001 | 2.901    | 0.0722  | 0.6895           | 0.8830  | -                   | -              | -              |
|             |            |                     |       |         |          |         |                  |         | 0.8147              | 0.1048         | 0.2887         |
|             |            |                     |       |         |          |         |                  |         | 0.9993              | 0.3948         | 0.4106         |
|             |            |                     |       |         |          |         |                  |         | 0.5087              | 0.1048         | 0.3464         |
|             |            |                     |       |         |          |         |                  |         | 0.8332              | 0.4024         | 0.6121         |
|             |            |                     |       |         |          |         |                  |         | 0.6193              | 0.6195         | 0.0812         |
|             |            |                     |       |         |          |         |                  |         | 0.4172              | 0.1118         | 0.4107         |
|             |            |                     |       |         |          |         |                  |         | 0.6189              | 0.0543         | 0.7141         |
|             |            |                     |       |         |          |         |                  |         | 0.5097              | 0.1359         | 0.5456         |
|             |            |                     |       |         |          |         |                  |         | 0.4917              | 0.2294         | 0.8859         |
|             |            |                     |       |         |          |         |                  |         | 0.3085              | 0.0968         | 0.5328         |
|             |            |                     |       |         |          |         |                  |         | 0.8348              | 0.3045         | 0.3846         |
|             |            |                     |       |         |          |         |                  |         | 0.7064              | 0.1216         | 0.3909         |
|             |            |                     |       |         |          |         |                  |         | 0.6570              | 0.0673         | 0.1902         |
|             |            |                     |       |         |          |         |                  |         | 0.5752              | 0.8729         | 0.2352         |
|             |            |                     |       |         |          |         |                  |         | 0.8310              | 0.4063         | 0.5437         |

Supplementary Table 3: Statistical information on Figure 2

|                                              |                     |         | Multiple comparison |                |                |                |                |                |
|----------------------------------------------|---------------------|---------|---------------------|----------------|----------------|----------------|----------------|----------------|
|                                              |                     |         | Female              |                |                | Male           |                |                |
| Direct social dyadic test                    | Test                | p-value | (+/+) vs (+/-)      | (+/+) vs (-/-) | (+/-) vs (-/-) | (+/+) vs (+/-) | (+/+) vs (-/-) | (+/-) vs (-/-) |
| First contact initiation, female, adolescent | Fisher's exact test | 0.0045  | 0.1291              | <b>0.0092</b>  | 0.2184         | -              | -              | -              |
| First contact initiation, male, adolescent   | Fisher's exact test | 0.0245  | -                   | -              | -              | 1.0000         | <b>0.0422</b>  | 0.1235         |
| First contact initiation, female, adult      | Fisher's exact test | 0.8849  | 1.0000              | 1.0000         | 1.0000         | -              | -              | -              |
| First contact initiation, male, adult        | Fisher's exact test | 0.08267 | -                   | -              | -              | 0.6594         | 0.2093         | 0.2547         |

  

|                               |            |                     | Multiple comparison |         |       |                |        |         |                |                |                |                |                |                |
|-------------------------------|------------|---------------------|---------------------|---------|-------|----------------|--------|---------|----------------|----------------|----------------|----------------|----------------|----------------|
|                               |            |                     | Genotype            |         | Sex   | Genotype × sex |        |         | Female         |                |                | Male           |                |                |
| Direct social dyadic test     | Test       | Normal distributed? | F                   | p-value | F     | p-value        | F      | p-value | (+/+) vs (+/-) | (+/+) vs (-/-) | (+/-) vs (-/-) | (+/+) vs (+/-) | (+/+) vs (-/-) | (+/-) vs (-/-) |
| Time in proximity, adolescent | 2way ANOVA | yes                 | 0.3594              | 0.6998  | 3.023 | 0.0879         | 1.071  | 0.3498  | 0.9946         | 0.8929         | 0.8417         | 0.7157         | 0.2522         | 0.7136         |
| Time in proximity, adult      | 2way ANOVA | yes                 | 0.1044              | 0.9011  | 8.786 | <b>0.0045</b>  | 0.4011 | 0.6716  | 0.8930         | 0.9984         | 0.9206         | 0.7020         | 0.7602         | 0.9971         |

  

|                               |            |                     | Multiple comparison |                 |         |                |        |         |                |                |                |                |                 |                |                |                 |                |
|-------------------------------|------------|---------------------|---------------------|-----------------|---------|----------------|--------|---------|----------------|----------------|----------------|----------------|-----------------|----------------|----------------|-----------------|----------------|
|                               |            |                     | Genotype            |                 | Sex     | Genotype × sex |        |         | Female         |                |                | Male           |                 |                | Pooled sexes   |                 |                |
| Behavior                      | Test       | Normal distributed? | F                   | p-value         | F       | p-value        | F      | p-value | (+/+) vs (+/-) | (+/+) vs (-/-) | (+/-) vs (-/-) | (+/+) vs (+/-) | (+/+) vs (-/-)  | (+/-) vs (-/-) | (+/+) vs (+/-) | (+/+) vs (-/-)  | (+/-) vs (-/-) |
| Self-grooming, adolescent     | 2way ANOVA | no                  | 17.36               | < <b>0.0001</b> | 0.07340 | 0.7875         | 1.187  | 0.3130  | 0.7546         | <b>0.0130</b>  | 0.0624         | 0.2817         | < <b>0.0001</b> | <b>0.0018</b>  | 0.2569         | < <b>0.0001</b> | <b>0.0003</b>  |
| Self-grooming, adult          | 2way ANOVA | no                  | 14.17               | < <b>0.0001</b> | 0.5587  | 0.4580         | 0.3670 | 0.6945  | 0.9902         | <b>0.0108</b>  | <b>0.0129</b>  | 0.4724         | <b>0.0004</b>   | <b>0.0137</b>  | 0.6261         | < <b>0.0001</b> | <b>0.0003</b>  |
| Digging, adolescent           | 2way ANOVA | yes                 | 13.94               | < <b>0.0001</b> | 6.212   | <b>0.0158</b>  | 2.989  | 0.0587  | 0.5629         | 0.1039         | 0.5026         | 0.4404         | < <b>0.0001</b> | <b>0.0006</b>  | 0.2557         | < <b>0.0001</b> | <b>0.0017</b>  |
| Digging adult                 | 2way ANOVA | yes                 | 14.66               | < <b>0.0001</b> | 1.094   | 0.3003         | 1.704  | 0.1915  | 0.2874         | <b>0.0061</b>  | 0.1774         | 0.9360         | <b>0.0006</b>   | <b>0.0003</b>  | 0.6841         | < <b>0.0001</b> | <b>0.0002</b>  |
| Nestlet shredding, adolescent | 2way ANOVA | yes                 | 2.528               | 0.0892          | 2.139   | 0.1494         | 1.345  | 0.2690  | 0.8618         | 0.8989         | 0.9983         | 0.4379         | <b>0.0215</b>   | 0.2897         | 0.4344         | 0.0734          | 0.5505         |
| Nestlet shredding, adult      | 2way ANOVA | no                  | 3.807               | 0.0284          | 1.196   | 0.2790         | 0.2406 | 0.7870  | 0.9746         | 0.1089         | 0.1089         | 0.6740         | 0.1980          | 0.6431         | 0.7327         | 0.0253          | 0.1306         |

**Supplementary Table 4: Statistical information on Figure 3**

|                                     |                            |     | Genotype                   |                   | Sex               |                   | Genotype × sex |                           | Multiple comparison |                            |                   |                |                       |                |                       |                   |                       |                |   |
|-------------------------------------|----------------------------|-----|----------------------------|-------------------|-------------------|-------------------|----------------|---------------------------|---------------------|----------------------------|-------------------|----------------|-----------------------|----------------|-----------------------|-------------------|-----------------------|----------------|---|
|                                     |                            |     | Normal                     | F                 | p-value           | F                 | p-value        | F                         | p-value             | Female                     |                   |                | Male                  |                |                       | Pooled sexes      |                       |                |   |
|                                     |                            |     | distributed?               |                   |                   |                   |                |                           |                     | (+/+) vs (+/-)             | (+/+) vs (-/-)    | (+/-) vs (-/-) | (+/+) vs (+/-)        | (+/+) vs (-/-) | (+/-) vs (-/-)        | (+/+) vs (+/-)    | (+/+) vs (-/-)        | (+/-) vs (-/-) |   |
| <b>Open Field</b>                   | <b>Test</b>                |     |                            |                   |                   |                   |                |                           |                     |                            |                   |                |                       |                |                       |                   |                       |                |   |
| Time in the border, adolescent      | 2way ANOVA                 | yes | 0.0422                     | 0.9587            | 1.901             | 0.1737            | 1.157          | 0.3221                    | 0.6810              | 0.7394                     | 0.9983            | 0.6077         | 0.4788                | 0.9710         | 0.9997                | 0.9890            | 0.9958                |                |   |
| Time in border, adult               | 2way ANOVA                 | yes | 5.527                      | <b>0.0065</b>     | 0.3324            | 0.5667            | 2.144          | 0.1270                    | 0.5291              | 0.1188                     | <b>0.0083</b>     | 0.2507         | 0.0586                | 0.7287         | 0.9265                | <b>0.0091</b>     | <b>0.0236</b>         |                |   |
| Time in the center, adolescent      | 2way ANOVA                 | yes | 0.0075                     | 0.9925            | 0.6373            | 0.4282            | 0.4239         | 0.6566                    | 0.9017              | 0.7909                     | 0.9670            | 0.9670         | 0.9670                | 0.9263         | 0.9927                | 0.9998            | 0.9952                |                |   |
| Time in the center, adult           | 2way ANOVA                 | yes | 5.060                      | <b>0.0097</b>     | 0.0379            | 0.8463            | 1.358          | 0.2658                    | 0.6063              | 0.2776                     | <b>0.0392</b>     | 0.3644         | <b>0.0324</b>         | 0.4391         | 0.9547                | 0.0140            | 0.0288                |                |   |
| Entries into the center, adolescent | 2way ANOVA                 | yes | 6.203                      | <b>0.0038</b>     | 3.744             | 0.0583            | 0.2675         | 0.7663                    | 0.7197              | <b>0.0151</b>              | 0.0804            | 0.8391         | 0.1340                | 0.3622         | 0.6127                | <b>0.0033</b>     | <b>0.0386</b>         |                |   |
| Entries into the center, adult      | 2way ANOVA                 | yes | 15.57                      | <b>&lt;0.0001</b> | 0.0404            | 0.8413            | 2.978          | 0.0593                    | 0.2598              | <b>0.0102</b>              | <b>&lt;0.0001</b> | 0.1933         | <b>0.0006</b>         | 0.0770         | 0.9920                | <b>&lt;0.0001</b> | <b>&lt;0.0001</b>     |                |   |
| <b>Marbles burying test</b>         |                            |     |                            |                   |                   |                   |                |                           |                     |                            |                   |                |                       |                |                       |                   |                       |                |   |
| Buried marbles, adolescent          | 2way ANOVA                 | no  | 4.870                      | <b>0.0114</b>     | 0.03509           | 0.8521            | 0.01691        | 0.9832                    | 0.7241              | 0.3916                     | 0.1006            | 0.6108         | 0.3368                | 0.0650         | 0.4493                | 0.1383            | <b>0.0084</b>         |                |   |
| Buried marbles, adult               | 2way ANOVA                 | no  | 23.91                      | <b>&lt;0.0001</b> | 2.184             | 0.1453            | 1.056          | 0.3549                    | <b>0.0496</b>       | <b>0.0006</b>              | 0.2032            | 0.0724         | <b>&lt;0.0001</b>     | <b>0.0023</b>  | <b>0.0049</b>         | <b>&lt;0.0001</b> | <b>0.0013</b>         |                |   |
| <b>Barnes Maze test</b>             |                            |     |                            |                   |                   |                   |                |                           |                     |                            |                   |                |                       |                |                       |                   |                       |                |   |
| <b>Latency to escape box</b>        | <b>Test</b>                |     | <b>Normal distributed?</b> | <b>Trial F</b>    | <b>p-value</b>    | <b>Genotype F</b> | <b>p-value</b> | <b>Trial × genotype F</b> | <b>p-value</b>      | <b>Multiple comparison</b> |                   |                | <b>(+/+) vs (+/-)</b> |                | <b>(+/+) vs (-/-)</b> |                   | <b>(+/-) vs (-/-)</b> |                |   |
| Female, adolescent                  | Mixed-effects model (REML) | yes |                            | 15.53             | <b>&lt;0.0001</b> | 4.435             | 0.0216         | 0.7495                    | 0.7575<             | -                          | -                 | -              | -                     | -              | -                     | -                 | -                     | -              | - |
| Trial 1                             |                            |     |                            |                   |                   |                   |                |                           |                     |                            |                   | 0.8052         | 0.9505                | 0.5634         |                       |                   |                       |                |   |
| Trial 2                             |                            |     |                            |                   |                   |                   |                |                           |                     |                            |                   | 0.4950         | 0.2696                | <b>0.0232</b>  |                       |                   |                       |                |   |
| Trial 3                             |                            |     |                            |                   |                   |                   |                |                           |                     |                            |                   | 0.1224         | 0.9959                | 0.1337         |                       |                   |                       |                |   |
| Trial 4                             |                            |     |                            |                   |                   |                   |                |                           |                     |                            |                   | 0.3617         | 0.8776                | 0.1999         |                       |                   |                       |                |   |
| Trial 5                             |                            |     |                            |                   |                   |                   |                |                           |                     |                            |                   | 0.1029         | 0.9603                | 0.0926         |                       |                   |                       |                |   |
| Trial 6                             |                            |     |                            |                   |                   |                   |                |                           |                     |                            |                   | 0.7539         | 0.8761                | 0.4373         |                       |                   |                       |                |   |
| Trial 7                             |                            |     |                            |                   |                   |                   |                |                           |                     |                            |                   | 0.2573         | 0.3169                | <b>0.0218</b>  |                       |                   |                       |                |   |
| Trial 8                             |                            |     |                            |                   |                   |                   |                |                           |                     |                            |                   | 0.3519         | 0.8753                | 0.1411         |                       |                   |                       |                |   |
| Trial 9                             |                            |     |                            |                   |                   |                   |                |                           |                     |                            |                   | 0.2355         | 0.9072                | 0.1795         |                       |                   |                       |                |   |
| Trial 10                            |                            |     |                            |                   |                   |                   |                |                           |                     |                            |                   | 0.1924         | 0.6980                | 0.5734         |                       |                   |                       |                |   |
| Male, adolescent                    | Mixed-effects model (REML) | yes |                            | 31.02             | <b>&lt;0.0001</b> | 1.088             | 0.3513         | 0.9541                    | 0.5139              | -                          | -                 | -              | -                     | -              | -                     | -                 | -                     | -              | - |
| Trial 1                             |                            |     |                            |                   |                   |                   |                |                           |                     |                            |                   | 0.6226         | 0.4947                | 0.1849         |                       |                   |                       |                |   |
| Trial 2                             |                            |     |                            |                   |                   |                   |                |                           |                     |                            |                   | 0.9514         | 0.3796                | 0.2059         |                       |                   |                       |                |   |
| Trial 3                             |                            |     |                            |                   |                   |                   |                |                           |                     |                            |                   | 0.8623         | 0.7267                | 0.3888         |                       |                   |                       |                |   |
| Trial 4                             |                            |     |                            |                   |                   |                   |                |                           |                     |                            |                   | 0.5999         | 0.4606                | 0.1576         |                       |                   |                       |                |   |
| Trial 5                             |                            |     |                            |                   |                   |                   |                |                           |                     |                            |                   | 0.4547         | 0.9515                | 0.7374         |                       |                   |                       |                |   |
| Trial 6                             |                            |     |                            |                   |                   |                   |                |                           |                     |                            |                   | 0.9944         | 0.6781                | 0.8112         |                       |                   |                       |                |   |
| Trial 7                             |                            |     |                            |                   |                   |                   |                |                           |                     |                            |                   | 0.1735         | 0.9529                | 0.5090         |                       |                   |                       |                |   |

Supplementary Material

| <b>Barnes Maze test</b>          |                            | <b>Normal</b>       | <b>Trial</b> | <b>Genotype</b> |          | <b>Trial × genotype</b> |          | <b>Multiple comparison</b> |                       |                       |                       |
|----------------------------------|----------------------------|---------------------|--------------|-----------------|----------|-------------------------|----------|----------------------------|-----------------------|-----------------------|-----------------------|
| <b>Latency to escape box</b>     | <b>Test</b>                | <b>distributed?</b> | <b>F</b>     | <b>p-value</b>  | <b>F</b> | <b>p-value</b>          | <b>F</b> | <b>p-value</b>             | <b>(+/+) vs (+/-)</b> | <b>(+/+) vs (-/-)</b> | <b>(+/-) vs (-/-)</b> |
|                                  | Trial 8                    |                     |              |                 |          |                         |          |                            | 0.6630                | 0.6490                | 0.9745                |
|                                  | Trial 9                    |                     |              |                 |          |                         |          |                            | 0.7279                | 0.7565                | 0.9964                |
|                                  | Trial 10                   |                     |              |                 |          |                         |          |                            | 0.5245                | 0.9677                | 0.7504                |
| Female, adult                    | Mixed-effects model (REML) | no                  | 12.61        | <0.0001         | 12.61    | 0.1311                  | 1.717    | 0.0371                     |                       |                       |                       |
|                                  | Trial 1                    |                     |              |                 |          |                         |          |                            | 0.7576                | 0.0307                | 0.0042                |
|                                  | Trial 2                    |                     |              |                 |          |                         |          |                            | 0.9822                | 0.1384                | 0.0998                |
|                                  | Trial 3                    |                     |              |                 |          |                         |          |                            | 0.4961                | 0.8979                | 0.3606                |
|                                  | Trial 4                    |                     |              |                 |          |                         |          |                            | 0.6821                | 0.4380                | 0.8005                |
|                                  | Trial 5                    |                     |              |                 |          |                         |          |                            | 0.6593                | 0.6553                | 0.2949                |
|                                  | Trial 6                    |                     |              |                 |          |                         |          |                            | 0.9427                | 0.5224                | 0.6191                |
|                                  | Trial 7                    |                     |              |                 |          |                         |          |                            | 0.9997                | 0.6447                | 0.6168                |
|                                  | Trial 8                    |                     |              |                 |          |                         |          |                            | 0.9997                | 0.8869                | 0.8930                |
|                                  | Trial 9                    |                     |              |                 |          |                         |          |                            | 0.7391                | 0.9801                | 0.8288                |
|                                  | Trial 10                   |                     |              |                 |          |                         |          |                            | 0.7622                | 0.8401                | 0.9657                |
| Male, adult                      | Mixed-effects model (REML) | no                  | 8.320        | 0.0002          | 4.505    | 0.0205                  | 0.5220   | 0.9465                     |                       |                       |                       |
|                                  | Trial 1                    |                     |              |                 |          |                         |          |                            | 0.7374                | 0.4212                | 0.1640                |
|                                  | Trial 2                    |                     |              |                 |          |                         |          |                            | 0.9006                | 0.3197                | 0.6188                |
|                                  | Trial 3                    |                     |              |                 |          |                         |          |                            | 0.9017                | 0.7195                | 0.5469                |
|                                  | Trial 4                    |                     |              |                 |          |                         |          |                            | 0.2714                | 0.2837                | 0.6169                |
|                                  | Trial 5                    |                     |              |                 |          |                         |          |                            | 0.3996                | 0.2164                | 0.4835                |
|                                  | Trial 6                    |                     |              |                 |          |                         |          |                            | 0.6926                | 0.1807                | 0.1210                |
|                                  | Trial 7                    |                     |              |                 |          |                         |          |                            | 0.0787                | 0.5588                | 0.1889                |
|                                  | Trial 8                    |                     |              |                 |          |                         |          |                            | 0.8165                | 0.2780                | 0.3973                |
|                                  | Trial 9                    |                     |              |                 |          |                         |          |                            | 0.3654                | 0.1109                | 0.2564                |
|                                  | Trial 10                   |                     |              |                 |          |                         |          |                            | 0.3653                | 0.1188                | 0.2748                |
| <b>Reversal Barnes Maze test</b> |                            | <b>Normal</b>       | <b>Trial</b> | <b>Genotype</b> |          | <b>Trial × genotype</b> |          | <b>Multiple comparison</b> |                       |                       |                       |
| <b>Latency to escape box</b>     | <b>Test</b>                | <b>distributed?</b> | <b>F</b>     | <b>p-value</b>  | <b>F</b> | <b>p-value</b>          | <b>F</b> | <b>p-value</b>             | <b>(+/+) vs (+/-)</b> | <b>(+/+) vs (-/-)</b> | <b>(+/-) vs (-/-)</b> |
| Female, adolescent               | Mixed-effects model (REML) | yes                 | 7.488        | <0.0001         | 1.102    | 0.3467                  | 0.8593   | 0.5730                     | -                     | -                     | -                     |
|                                  | Trial 1                    |                     |              |                 |          |                         |          |                            | 0.9178                | 0.6690                | 0.3855                |
|                                  | Trial 2                    |                     |              |                 |          |                         |          |                            | 0.3093                | 0.9893                | 0.5019                |
|                                  | Trial 3                    |                     |              |                 |          |                         |          |                            | 0.2935                | 0.9900                | 0.3684                |



| Reversal Barnes Maze test |                            | Normal       | Trial |         | Genotype |         | Trial × genotype |               | Multiple comparison |                |                |
|---------------------------|----------------------------|--------------|-------|---------|----------|---------|------------------|---------------|---------------------|----------------|----------------|
| Latency to escape box     | Test                       | distributed? | F     | p-value | F        | p-value | F                | p-value       | (+/+) vs (+/-)      | (+/+) vs (-/-) | (+/-) vs (-/-) |
|                           | Trial 4                    |              |       |         |          |         |                  |               | 0.9974              | 0.8530         | 0.6516         |
|                           | Trial 5                    |              |       |         |          |         |                  |               | 0.9330              | 0.8257         | 0.5688         |
|                           | Trial 6                    |              |       |         |          |         |                  |               | 0.7047              | 0.8463         | 0.4710         |
| Male, adolescent          | Mixed-effects model (REML) | yes          | 17.58 | <0.0001 | 0.9203   | 0.4106  | 0.8607           | 0.5716        | -                   | -              | -              |
|                           | Trial 1                    |              |       |         |          |         |                  |               | 0.9904              | 0.8482         | 0.9211         |
|                           | Trial 2                    |              |       |         |          |         |                  |               | 0.0884              | 0.7598         | 0.2402         |
|                           | Trial 3                    |              |       |         |          |         |                  |               | 0.8054              | 0.5777         | 0.9313         |
|                           | Trial 4                    |              |       |         |          |         |                  |               | 0.1805              | 0.9141         | 0.7083         |
|                           | Trial 5                    |              |       |         |          |         |                  |               | 0.1247              | 0.0878         | 0.8747         |
|                           | Trial 6                    |              |       |         |          |         |                  |               | 0.5615              | 0.9175         | 0.8485         |
| Female, adult             | Mixed-effects model (REML) | yes          | 15.37 | <0.0001 | 1.695    | 0.2026  | 2.515            | <b>0.0084</b> |                     |                |                |
|                           | Trial 1                    |              |       |         |          |         |                  |               | 0.2758              | 0.7961         | <b>0.0267</b>  |
|                           | Trial 2                    |              |       |         |          |         |                  |               | >0.9999             | 0.6412         | 0.6062         |
|                           | Trial 3                    |              |       |         |          |         |                  |               | 0.4038              | 0.4512         | 0.9606         |
|                           | Trial 4                    |              |       |         |          |         |                  |               | 0.4126              | 0.7724         | 0.2367         |
|                           | Trial 5                    |              |       |         |          |         |                  |               | 0.8532              | 0.5398         | 0.1708         |
|                           | Trial 6                    |              |       |         |          |         |                  |               | 0.6532              | 0.9508         | 0.6864         |
| Male, adult               | Mixed-effects model (REML) | yes          | 11.84 | <0.0001 | 1.532    | 0.2343  | 2.221            | <b>0.0203</b> |                     |                |                |
|                           | Trial 1                    |              |       |         |          |         |                  |               | 0.8792              | 0.0916         | 0.1383         |
|                           | Trial 2                    |              |       |         |          |         |                  |               | 0.5941              | 0.6475         | 0.2661         |
|                           | Trial 3                    |              |       |         |          |         |                  |               | 0.4173              | 0.3653         | 0.9987         |
|                           | Trial 4                    |              |       |         |          |         |                  |               | 0.2123              | 0.2744         | 0.7331         |
|                           | Trial 5                    |              |       |         |          |         |                  |               | 0.9479              | 0.6321         | 0.7538         |
|                           | Trial 6                    |              |       |         |          |         |                  |               | 0.6885              | 0.9901         | 0.8244         |

Supplementary Table 5: Statistical information on Figure 4

|                                              | Test                                    | Normal distributed? | Adolescent vs. adult |               |               |               |               |               |         |
|----------------------------------------------|-----------------------------------------|---------------------|----------------------|---------------|---------------|---------------|---------------|---------------|---------|
|                                              |                                         |                     | Female (++)          | Female (+/-)  | Female (-/-)  | Male (++)     | Male (+/-)    | Male (-/-)    |         |
|                                              |                                         |                     | p-value              | p-value       | p-value       | p-value       | p-value       | p-value       | p-value |
| Grip strength                                | Paired two-tailed t-test                | yes                 | 0.9795               | 0.3035        | 0.5688        | <b>0.0032</b> | <b>0.0161</b> | 0.0977        |         |
| Grid hang time                               | Wilcoxon matched-pairs signed rank test | no                  | 0.5000               | <b>0.0313</b> | 0.2500        | 0.1875        | 0.1875        | <b>0.0117</b> |         |
| Open field, distance moved                   | Paired two-tailed t-test                | yes                 | 0.9725               | 0.0587        | 0.5969        | 0.0987        | <b>0.0431</b> | 0.9736        |         |
| Direct social dyadic test, time in proximity | Paired two-tailed t-test                | yes                 | 0.2284               | 0.0945        | 0.4225        | 0.9363        | 0.5795        | 0.5102        |         |
| Time spent self-grooming                     | Wilcoxon matched-pairs signed rank test | no                  | <b>0.0254</b>        | <b>0.0264</b> | 0.7344        | 0.2334        | 0.1055        | 0.8008        |         |
| Time spent digging                           | Paired two-tailed t-test                | yes                 | <b>0.0079</b>        | <b>0.0241</b> | 0.1952        | 0.2103        | <b>0.0008</b> | <b>0.0266</b> |         |
| Nesting test, processed nestlet              | Wilcoxon matched-pairs signed rank test | no                  | <b>0.0137</b>        | <b>0.0205</b> | <b>0.0039</b> | <b>0.0020</b> | <b>0.0137</b> | <b>0.0391</b> |         |
| Open field, entries into center zone         | Paired two-tailed t-test                | yes                 | 0.6020               | 0.1293        | <b>0.0326</b> | <b>0.0433</b> | 0.1473        | 0.9292        |         |
| Number of buried marbles                     | Wilcoxon matched-pairs signed rank test | no                  | <b>0.0059</b>        | <b>0.0156</b> | 0.5000        | <b>0.0020</b> | <b>0.0039</b> | 0.5000        |         |

Supplementary Table 6: Statistical information on Supplementary Figure 1

| Pup development             | Test                       | Normal distributed? | PND   |                   | Genotype |         | PND × genotype |         | Multiple comparison |               |                |
|-----------------------------|----------------------------|---------------------|-------|-------------------|----------|---------|----------------|---------|---------------------|---------------|----------------|
|                             |                            |                     | F     | p-value           | F        | p-value | F              | p-value | (++) vs (+/-)       | (++) vs (-/-) | (+/-) vs (-/-) |
| Latency to right up, female | Mixed-effects model (REML) | yes                 | 31.81 | <b>&lt;0.0001</b> | 0.06662  | 0.9357  | 0.7006         | 0.6904  | -                   | -             | -              |
| PND 2                       |                            |                     |       |                   |          |         |                |         | 0.9070              | 0.4338        | 0.7133         |
| PND 4                       |                            |                     |       |                   |          |         |                |         | 0.8984              | 0.6825        | 0.9103         |
| PND 6                       |                            |                     |       |                   |          |         |                |         | 0.8334              | 0.9822        | 0.7312         |
| PND 8                       |                            |                     |       |                   |          |         |                |         | 0.8775              | 0.4519        | 0.3501         |
| PND 10                      |                            |                     |       |                   |          |         |                |         | 0.9351              | 0.9424        | 0.7394         |
| Latency to right up, male   | Mixed-effects model (REML) | yes                 | 23.62 | <b>&lt;0.0001</b> | 0.1013   | 0.9041  | 0.7839         | 0.6181  | -                   | -             | -              |
| PND 2                       |                            |                     |       |                   |          |         |                |         | 0.8564              | 0.7566        | 0.5025         |
| PND 4                       |                            |                     |       |                   |          |         |                |         | 0.7953              | 0.8283        | 0.9916         |
| PND 6                       |                            |                     |       |                   |          |         |                |         | 0.9741              | 0.6044        | 0.2934         |
| PND 8                       |                            |                     |       |                   |          |         |                |         | 0.7467              | 0.7036        | 0.9112         |
| PND 10                      |                            |                     |       |                   |          |         |                |         | 0.8119              | 0.8319        | >0.9999        |
| Body weight, female         | Mixed-effects model (REML) | yes                 | 1071  | <b>&lt;0.0001</b> | 0.2820   | 0.7565  | 0.2868         | 0.9690  | -                   | -             | -              |
| PND 2                       |                            |                     |       |                   |          |         |                |         | 0.5724              | 0.8509        | 0.8926         |
| PND 4                       |                            |                     |       |                   |          |         |                |         | 0.5174              | 0.8323        | 0.8757         |

| Pup development   | Test                       | Normal distributed? | PND F | p-value | Genotype |         | PND × genotype |         | Multiple comparison |                |                |
|-------------------|----------------------------|---------------------|-------|---------|----------|---------|----------------|---------|---------------------|----------------|----------------|
|                   |                            |                     |       |         | F        | p-value | F              | p-value | (+/+) vs (+/-)      | (+/+) vs (-/-) | (+/-) vs (-/-) |
|                   |                            |                     |       |         |          |         |                |         | 0.5112              | 0.8414         | 0.8443         |
|                   |                            |                     |       |         |          |         |                |         | 0.7951              | 0.9556         | 0.9414         |
|                   |                            |                     |       |         |          |         |                |         | 0.9958              | 0.9727         | 0.9296         |
| Body weight, male | Mixed-effects model (REML) | yes                 | 967.5 | <0.0001 | 0.4181   | 0.6637  | 1.712          | 0.1081  | -                   | -              | -              |
|                   |                            |                     |       |         |          |         |                |         | 0.9944              | 0.9998         | 0.9907         |
|                   |                            |                     |       |         |          |         |                |         | 0.9568              | 0.9984         | 0.9518         |
|                   |                            |                     |       |         |          |         |                |         | 0.7663              | 0.9320         | 0.9396         |
|                   |                            |                     |       |         |          |         |                |         | 0.5593              | 0.9509         | 0.7083         |
|                   |                            |                     |       |         |          |         |                |         | 0.4425              | 0.8462         | 0.7184         |

  

|                                                   | Test                     | Normal distributed? | Genotype       |                | Sex F | p-value       | Genotype × sex |                | Multiple comparison |                     |                     | Pooled sexes      |                   |                   |                |                |                |
|---------------------------------------------------|--------------------------|---------------------|----------------|----------------|-------|---------------|----------------|----------------|---------------------|---------------------|---------------------|-------------------|-------------------|-------------------|----------------|----------------|----------------|
|                                                   |                          |                     | F              | p-value        |       |               | F              | p-value        | Female              |                     |                     | Male              |                   |                   |                |                |                |
|                                                   |                          |                     | (+/+) vs (+/-) | (+/+) vs (-/-) |       |               | (+/-) vs (-/-) | (+/+) vs (+/-) | (+/+) vs (-/-)      | (+/-) vs (-/-)      | (+/+) vs (+/-)      | (+/+) vs (-/-)    | (+/-) vs (-/-)    |                   |                |                |                |
| Body weight, adolescent                           | 2way ANOVA               | yes                 | 1.668          | 0.1981         | 4.926 | <b>0.0307</b> | 2.325          | 0.1075         | 0.9368              | 0.2316              | 0.3700              | 0.0777            | 0.5663            | 0.5143            | 0.3889         | 0.8861         | 0.1997         |
| Body weight, adult                                | 2way ANOVA               | yes                 | 0.0718         | 0.9308         | 121.0 | <0.0001       | 3.235          | <b>0.0471</b>  | 0.3909              | 0.9981              | 0.3782              | 0.1685            | 0.9983            | 0.2188            | 0.9298         | 0.9964         | 0.9611         |
| <b>Direct social dyadic test</b>                  |                          |                     |                |                |       |               |                |                |                     |                     |                     |                   |                   |                   |                |                |                |
| USV call rate, adolescent                         | 2way ANOVA               | no                  | 0.8530         | 0.4320         | 7.166 | <b>0.0099</b> | 1.463          | 0.2409         | 0.6558              | 0.9471              | 0.4729              | 0.7126            | 0.1717            | 0.6209            | -              | -              | -              |
| USV call rate, adult                              | 2way ANOVA               | no                  | 0.2551         | 0.7758         | 42.41 | <0.0001       | 0.3091         | 0.7355         | 0.8251              | >0.9999             | 0.8201              | 0.8829            | 0.6944            | 0.9410            | -              | -              | -              |
| <b>3 chamber sociability test</b>                 |                          |                     |                |                |       |               |                |                |                     |                     |                     |                   |                   |                   |                |                |                |
| Time in chamber with social or inanimate stimulus |                          |                     |                |                |       |               |                |                | <b>Female (+/+)</b> | <b>Female (+/-)</b> | <b>Female (-/-)</b> | <b>Male (+/+)</b> | <b>Male (+/-)</b> | <b>Male (-/-)</b> |                |                |                |
| Adolescent                                        | Paired two-tailed t-test | yes                 |                |                |       |               |                |                | <b>p-value</b>      | <b>p-value</b>      | <b>p-value</b>      | <b>p-value</b>    | <b>p-value</b>    | <b>p-value</b>    | <b>p-value</b> | <b>p-value</b> | <b>p-value</b> |
| Adult                                             | Paired two-tailed t-test | yes                 |                |                |       |               |                |                | <b>0.0001</b>       | <b>0.0009</b>       | <b>&lt;0.0001</b>   | <b>0.0011</b>     | <b>0.0005</b>     | <b>0.0021</b>     |                |                |                |
|                                                   |                          |                     |                |                |       |               |                |                | <b>0.0095</b>       | <b>0.0001</b>       | <b>0.0015</b>       | <b>0.0033</b>     | <b>0.0018</b>     | <b>0.0374</b>     |                |                |                |
